# Supplementary material for: Differences in perception of breast cancer treatment between patients, physicians, and nurses and unmet information needs in Japan
Source: PubMed Central journal article supplement (PMC7083820; doi:10.1007/s00520-019-05029-z), 2019-09-03

# Online Resource 2

- Can live while maintaining QoL
- Longer survival
- Cancer reduction
- Mild side effects
- Inexpensive treatment cost
- Can be treated on an outpatient basis
- Fewer treatment hours
- Other
- No priority

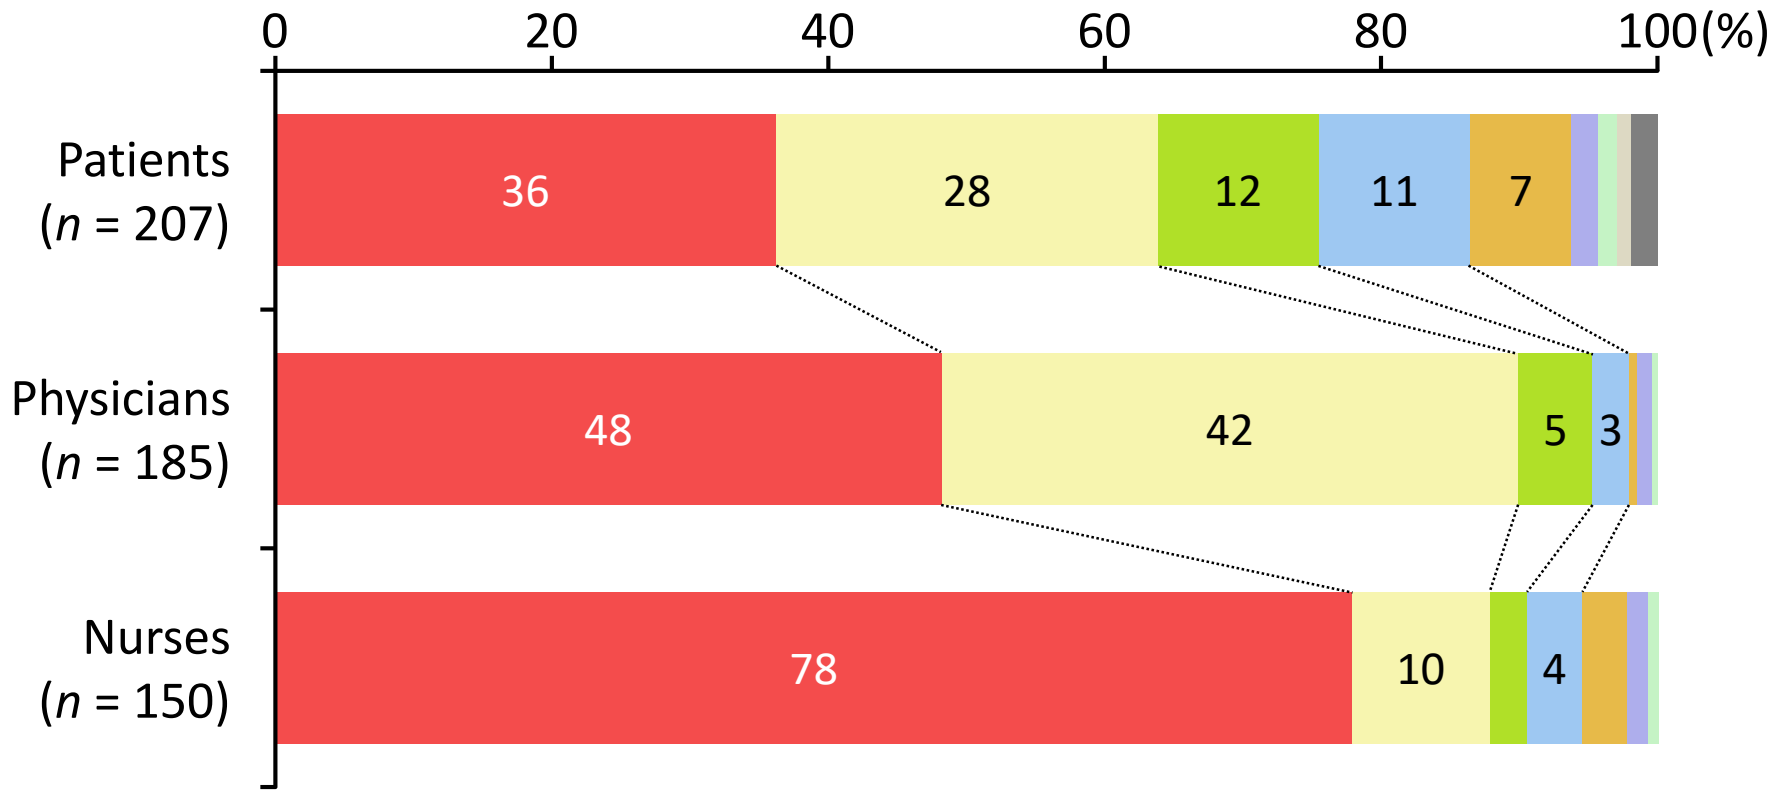

Supplement: 520_2019_5029_MOESM2_ESM.pdf [file 520_2019_5029_MOESM2_ESM.pdf]
