# Supplementary material for: Differences in perception of breast cancer treatment between patients, physicians, and nurses and unmet information needs in Japan
Source: PubMed Central journal article supplement (PMC7083820; doi:10.1007/s00520-019-05029-z), 2019-09-03

# Online Resource 3

### Patients (n=207)

0% 20% 40% 60% 80% 100%

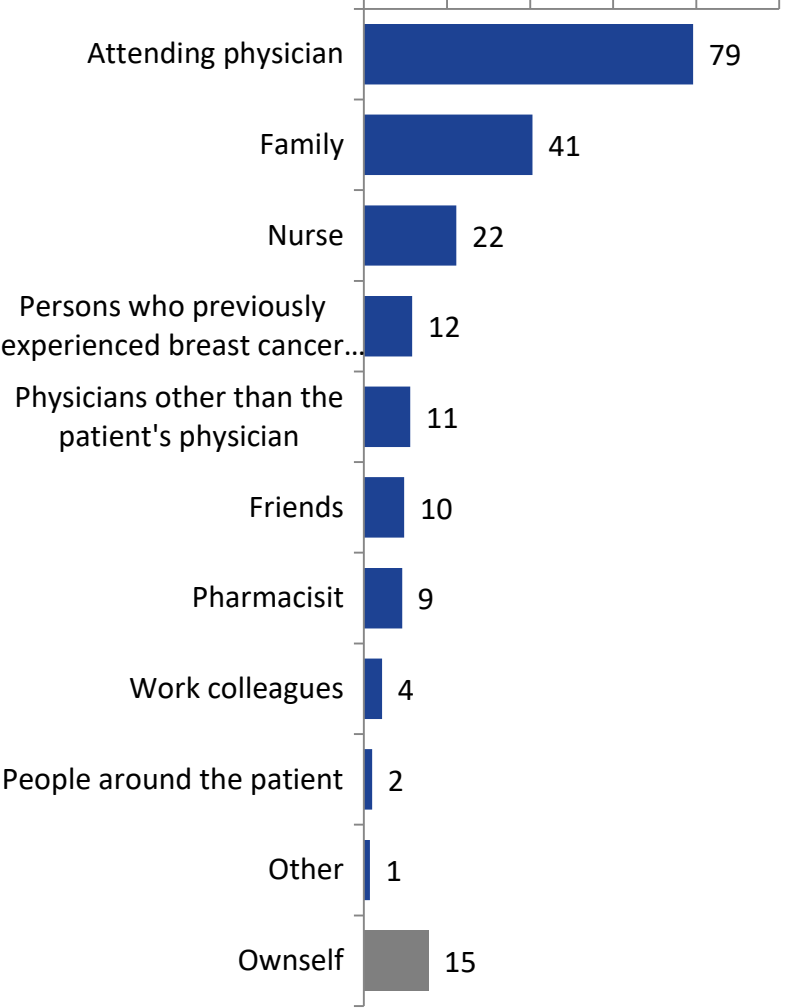

### Physicians (n=185)

0% 20% 40% 60% 80% 100%

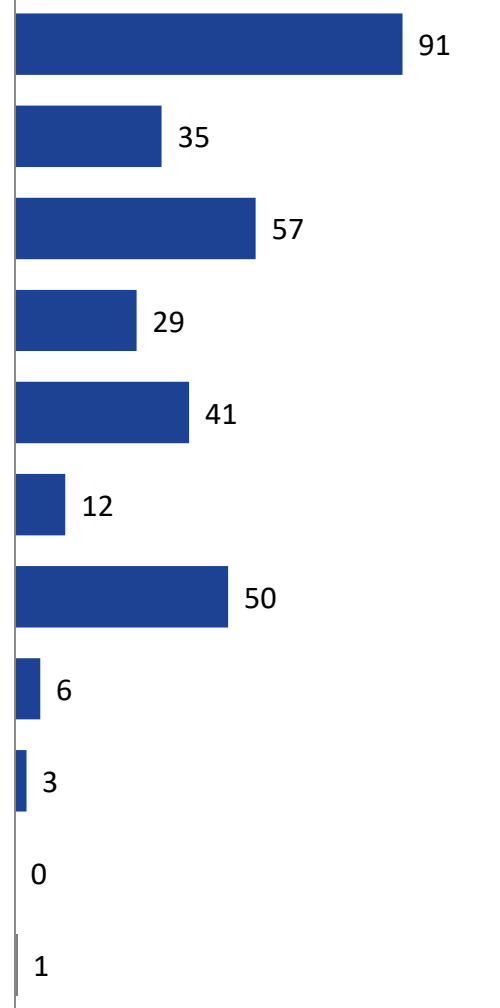

### Nurses (n=150)

0% 20% 40% 60% 80% 100%

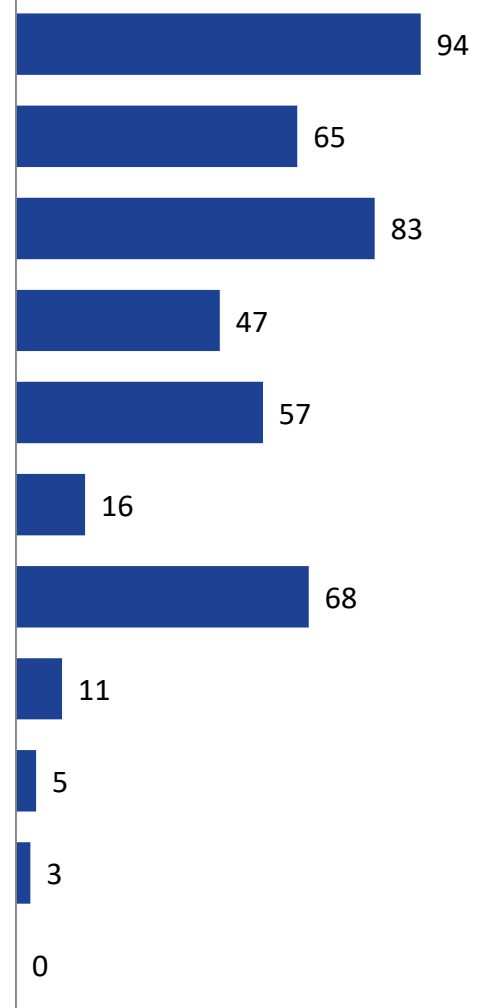

Supplement: 520_2019_5029_MOESM3_ESM.pdf [file 520_2019_5029_MOESM3_ESM.pdf]
